# Supplementary material
Source: PubMed Central journal article supplement (PMC2265142)

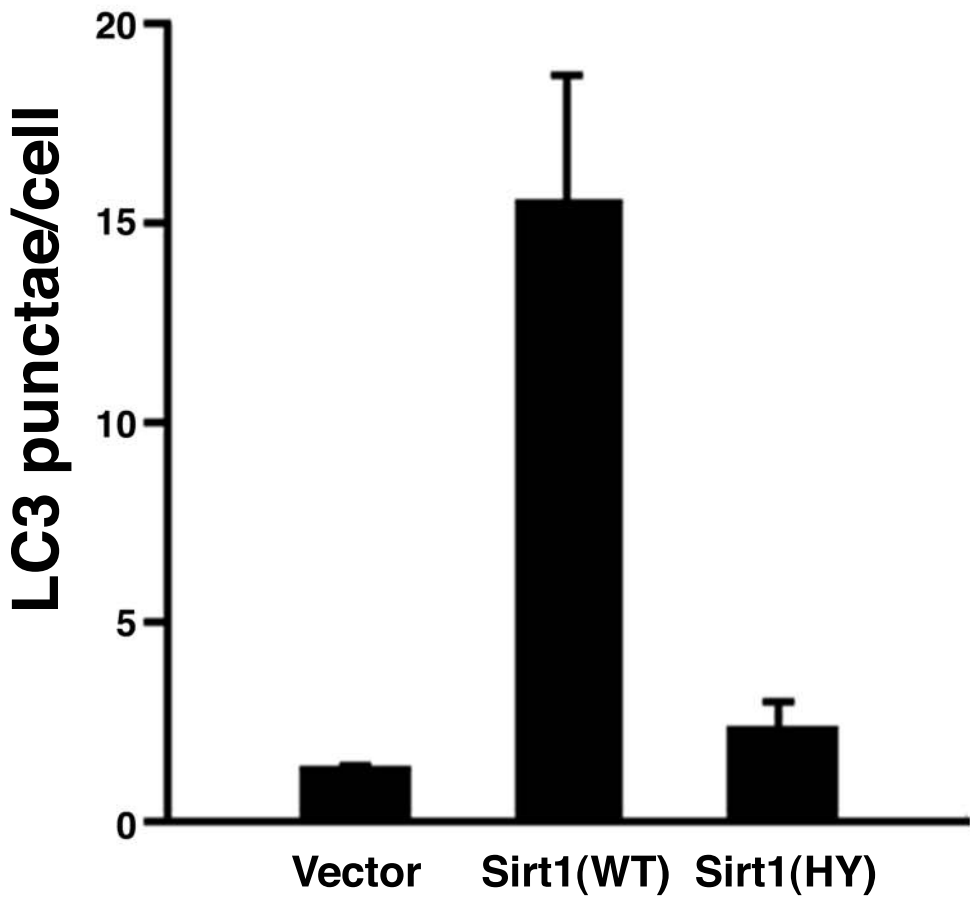

Supplement: pnas_0712145105_1.pdf [file pnas_0712145105_1.pdf]

**IP: acetyl Lys**  
**WB: myc-Atg5**

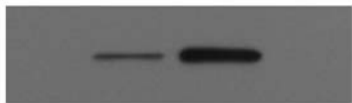

**Input**

**myc-Atg5**

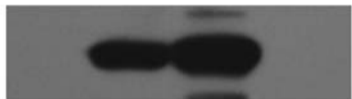

**actin**

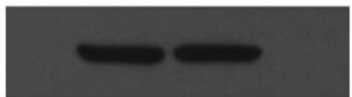

**Atg5<sub>WT</sub> Atg5<sub>K130R</sub>**

Supplement: pnas_0712145105_10.pdf [file pnas_0712145105_10.pdf]

**Fed**

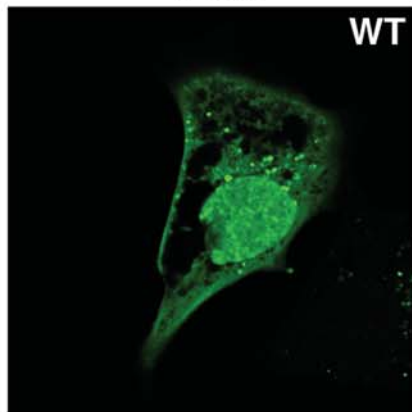

**Starved**

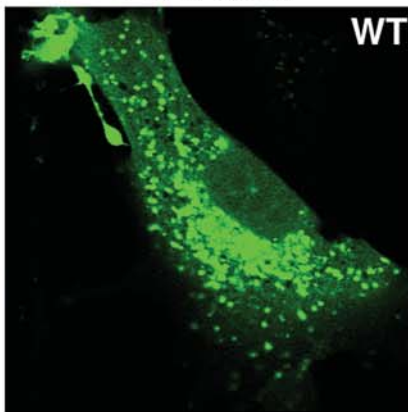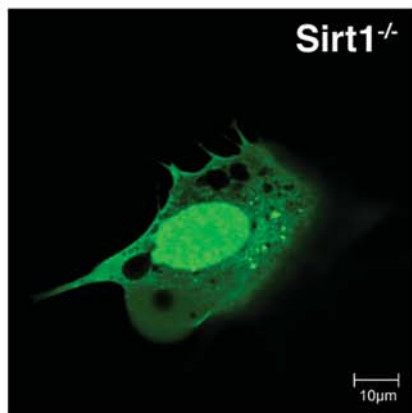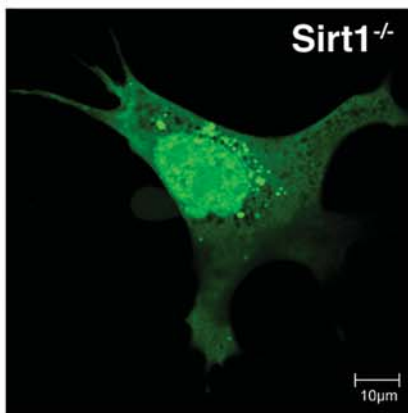

Supplement: pnas_0712145105_2.pdf [file pnas_0712145105_2.pdf]

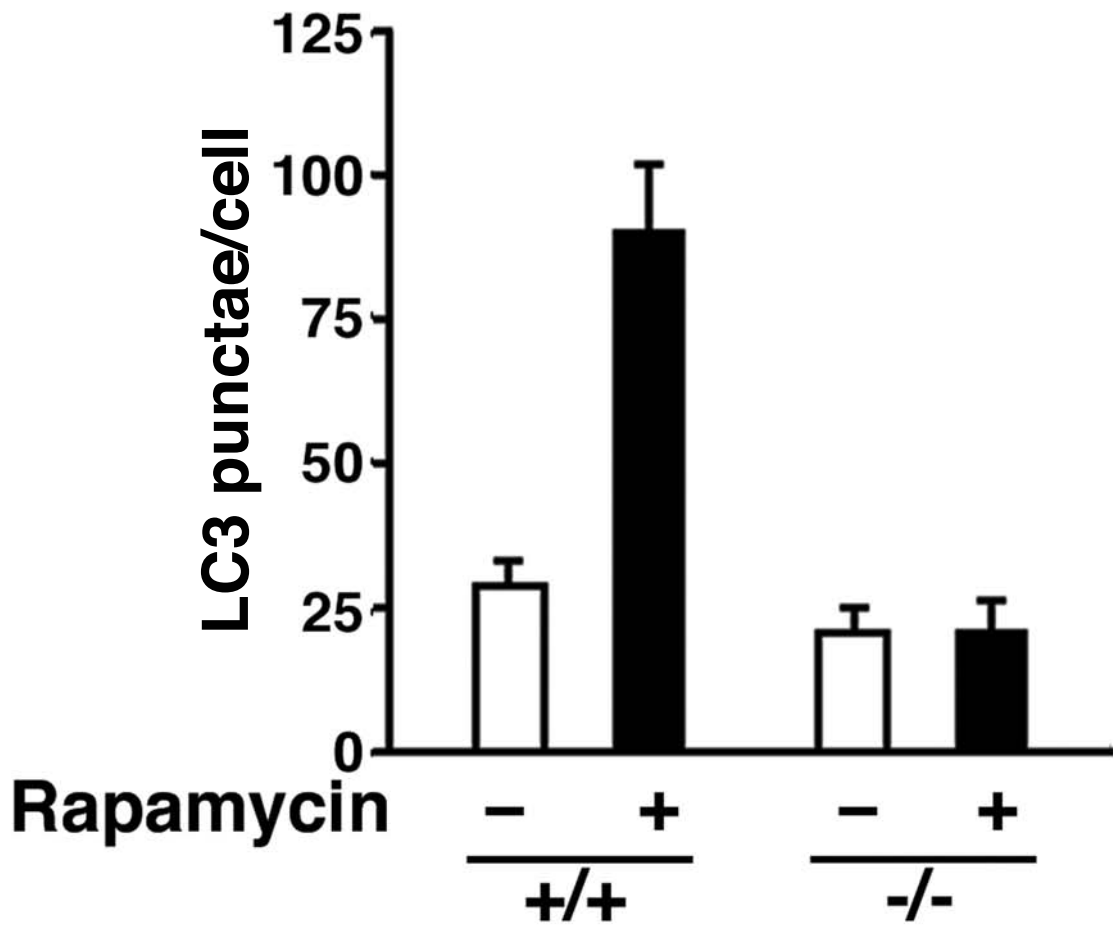

Supplement: pnas_0712145105_3.pdf [file pnas_0712145105_3.pdf]

**a**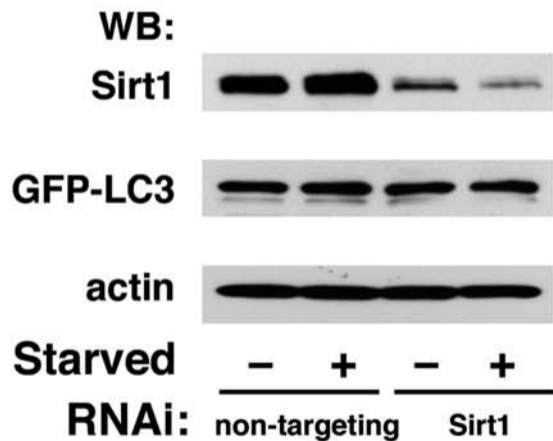**b**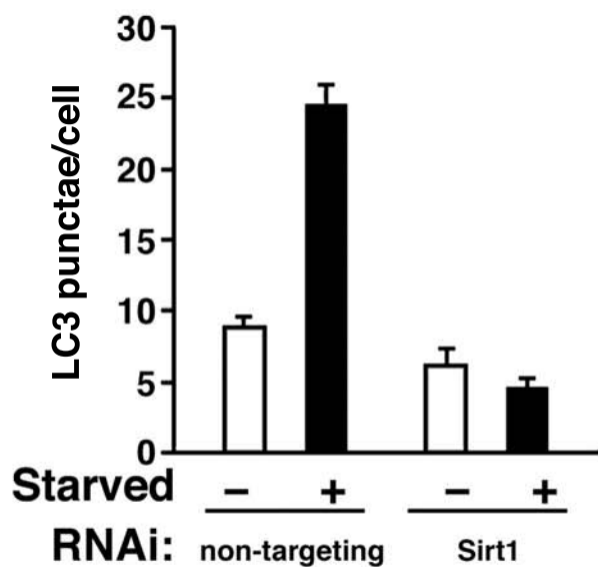

Supplement: pnas_0712145105_4.pdf [file pnas_0712145105_4.pdf]

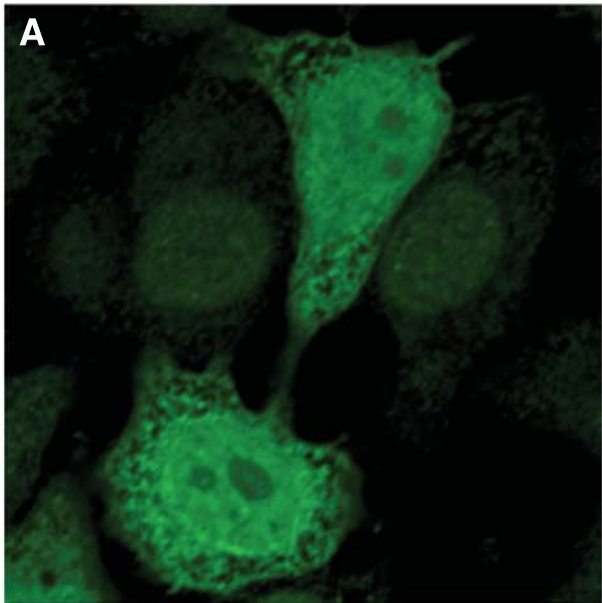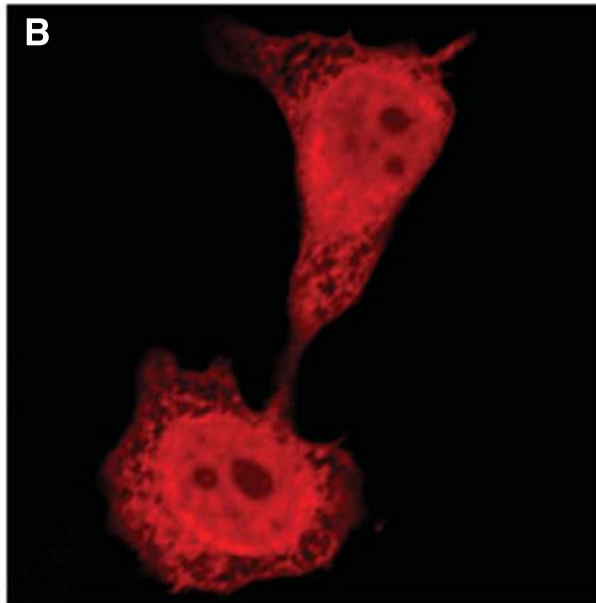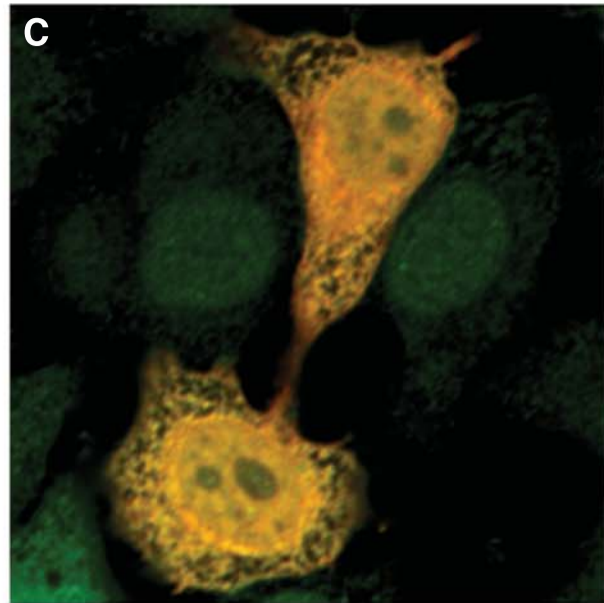

Supplement: pnas_0712145105_5.pdf [file pnas_0712145105_5.pdf]

**Nicotinamide**    -    +

**WB:**  
**Acetyl-Lys**

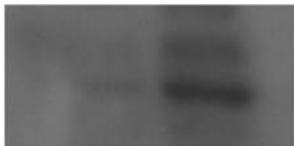

**WB:**  
**Atg8**

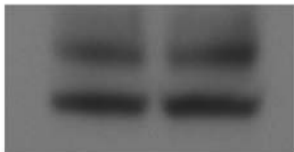

Supplement: pnas_0712145105_6.pdf [file pnas_0712145105_6.pdf]

|                 |          |           |           |           |
|-----------------|----------|-----------|-----------|-----------|
| <b>His-Atg8</b> | <b>+</b> | <b>+</b>  | <b>+</b>  | <b>+</b>  |
| <b>Sirt1</b>    | <b>-</b> | <b>WT</b> | <b>WT</b> | <b>HY</b> |
| <b>NAD</b>      | <b>-</b> | <b>-</b>  | <b>+</b>  | <b>+</b>  |

**WB:**  
**Acetyl-Lys**

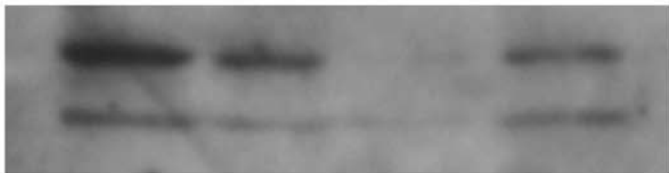

**WB:**  
**Atg8**

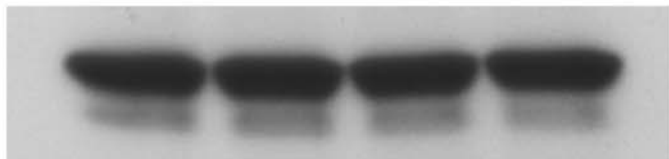

Supplement: pnas_0712145105_7.pdf [file pnas_0712145105_7.pdf]

**Vector**

**myc-Atg5**

**IP: Acetyl lys**  
**WB: myc**

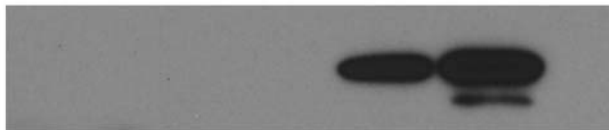

**WB:**  
**myc**

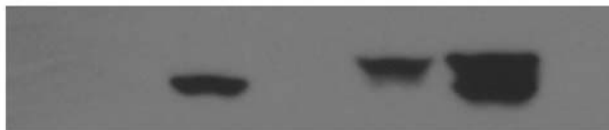

← **Atg5**  
← **Sirt3**

**Input**

**actin**

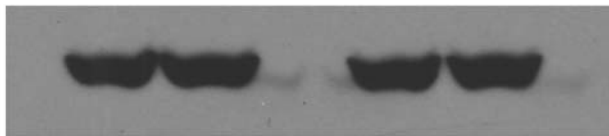

**myc-Sirt3**

**-**

**+**

**-**

**+**

Supplement: pnas_0712145105_8.pdf [file pnas_0712145105_8.pdf]

**p-AMPK**

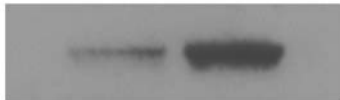

**AMPK**

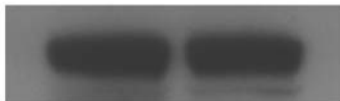

**actin**

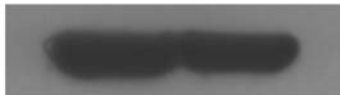

---

**+/+ -/-**

Supplement: pnas_0712145105_9.pdf [file pnas_0712145105_9.pdf]
